# Supplementary material for: Tailoring the mechanical properties of gelatin methacryloyl hydrogels through manipulation of the photocrosslinking conditions
Source: Royal Society of Chemistry journal article supplement (doi:10.1039/c7sm02187a), 2018-01-01
Supplement: c7sm02187a1.pdf [file c7sm02187a1.pdf]

Supporting information for “Monitoring the photocrosslinking kinetics of gelatin methacryloyl using in situ photorheology” by CD O’Connell et. al.

### 1. Measurement of I2959 molar extinction coefficient in DPBS

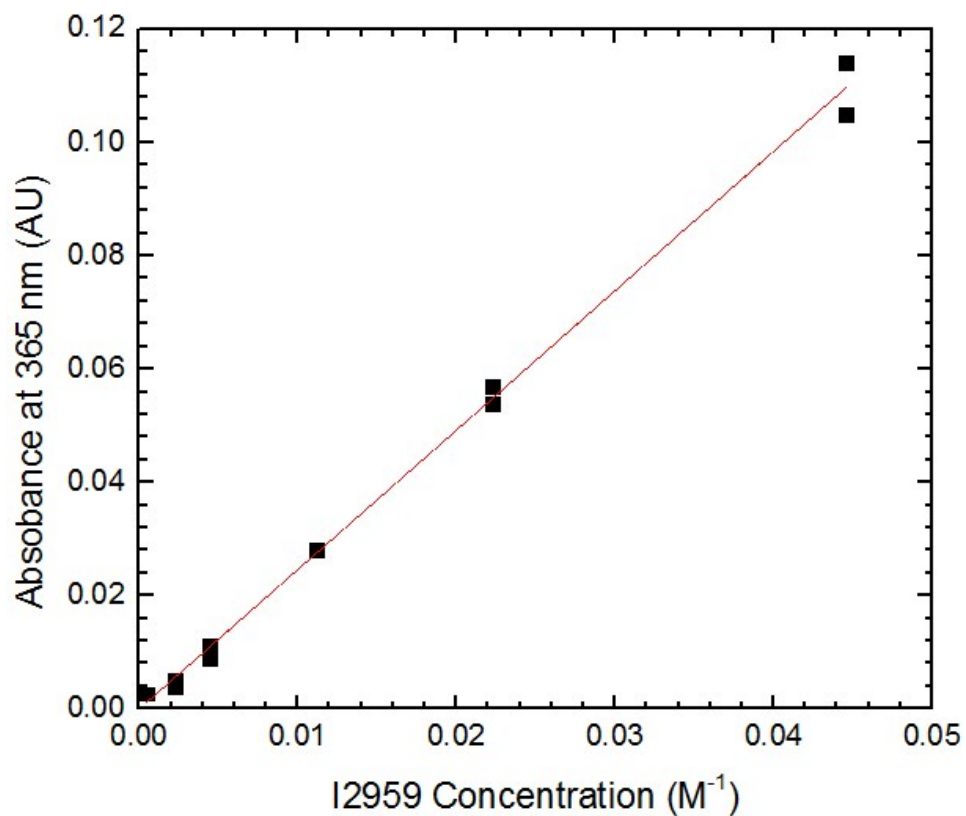

Figure S1: Absorption of 365 nm light as a function of I2959 concentration. Molar extinction coefficient was measured at  $2.46 \pm 0.035 \text{ M}^{-1}$  ( $R^2=0.0998$ )

### 2. Photo-initiator degradation model

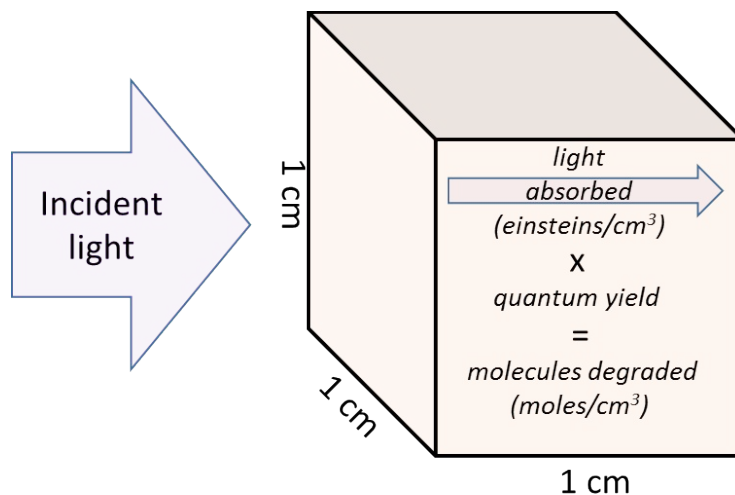

**Figure S2: photo-initiator degradation is modelled for light exposed on a 1 cm cube (mimicking the geometry of a UV-vis cuvette). Incident light intensity (in einsteins s<sup>-1</sup> cm<sup>-2</sup>) x fraction of light absorbed x quantum yield = degradation rate of photo-initiator (in moles s<sup>-1</sup>).**

### 3. Justification of rheological measurements as a proxy for hydrogel crosslinking

According to the theory of polymer elasticity the elastic modulus ( $E$ ) of a rubber-like material is directly proportional to the crosslink density,  $V_c$ .<sup>1</sup>

$$E = (3\rho RT)/M_c = (3\rho RT)V_c \quad (6)$$

where,  $R$  is the gas constant,  $T$  is absolute temperature,  $\rho$  is polymer density, and  $M_c$  is the average molecular weight between crosslinks. For hydrogels this expression often contains a constant pre-factor denoting dilution of the network. Meanwhile the elastic modulus is related to the shear modulus ( $G$ ) by:

$$E = 2G(1 + \nu) \quad (7)$$

where  $\nu$  is Poisson's ratio (typically 0.5 for most materials). The shear modulus is thus linear with respect to crosslink density, according to:

$$G = \rho RTV_c \quad (8)$$

Thus, the increase in shear modulus is directly related to the rate of crosslinking.

4. Estimated decrease in I2959 concentration with time at a range of light intensities.

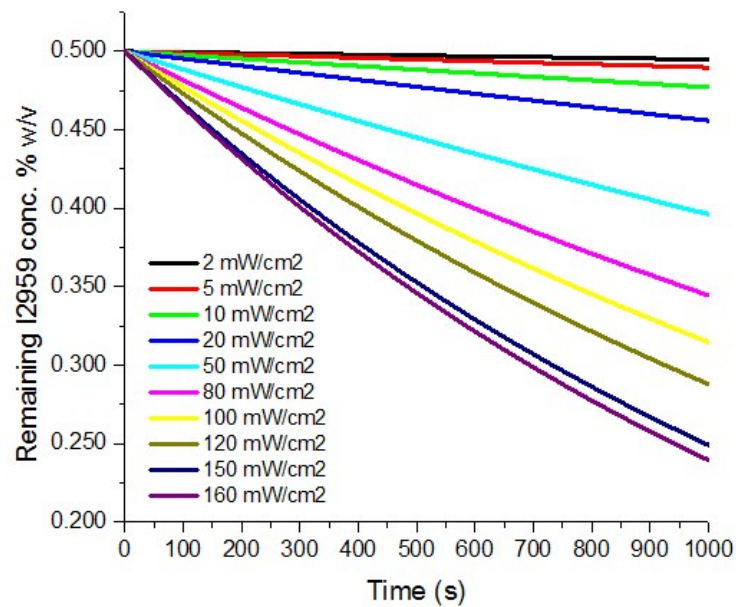

Figure S3: Calculated I2959 concentration as a function of time at a range of light intensities. Most GelMa experiments were completed within 200s, during which time the GelMa concentration does not decrease by more than 10%, even for high intensities.
